# Supplementary material
Source: Springer Nature journal article supplement (https://www.springermedizin.de/resource/supplementary/12990_2009_234_MOESM7_ESM.pdf/9612850)

## A. ACC stim-rec site

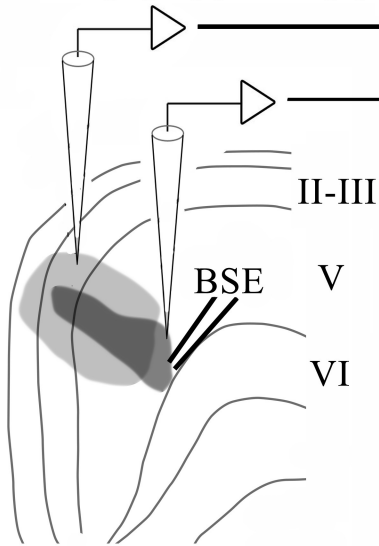

## B. EFP; $\text{Ca}^{2+}$

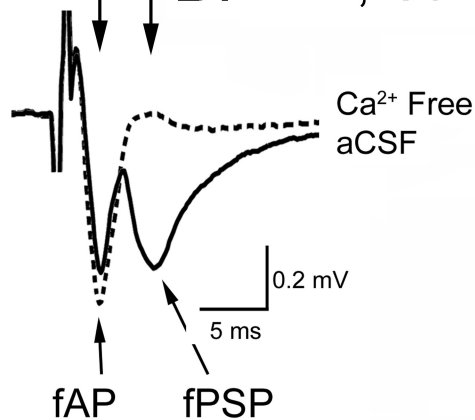

## C. EFP; Glu

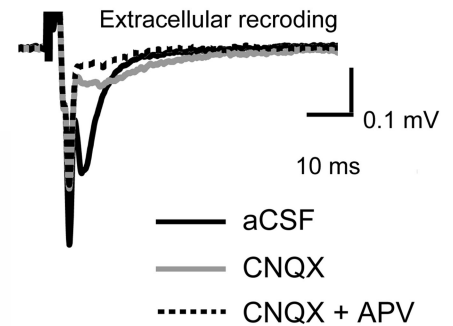

## D. Calcium effect on response to tetanic stimulation

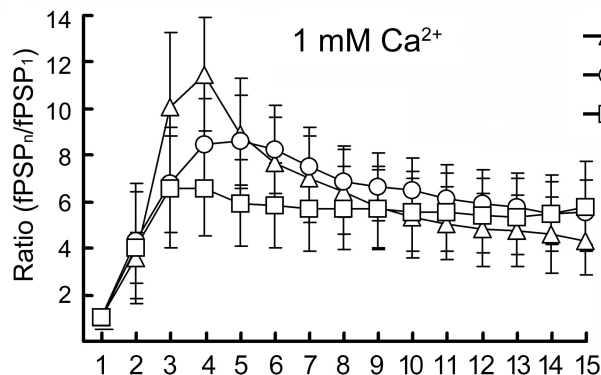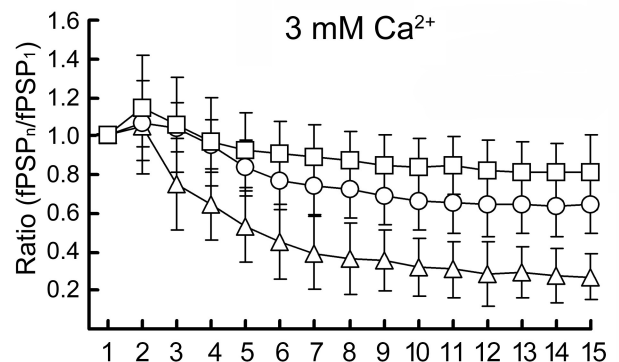

## E. Response ratio

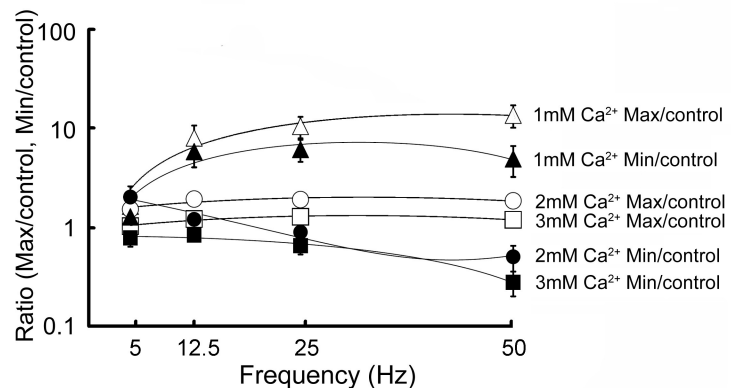

Supplement: MOESM7 [file 9612850]
